# Supplementary material for: De-acetylation and degradation of HSPA5 is critical for E1A metastasis suppression in breast cancer cells
Source: PubMed Central journal article supplement (PMC4279393; doi:10.18632/oncotarget.2510), 2014-09-25
Supplement: oncotarget-05-10558-s001.pdf [file oncotarget-05-10558-s001.pdf]

## De-acetylation and degradation of HSPA5 is critical for E1A metastasis suppression in breast cancer cells

### Supplementary Material

**Supplementary Table S1: Sequences and information of PCR primers for mRNA and cloning**

|                                                        |
|--------------------------------------------------------|
| <b>mRNA PCR primers</b>                                |
| HSPA5                                                  |
| 5'-AGCCTGGCGACAAGAGTG-3' (forward)                     |
| 5'-AATCCAATACTGCCCAAGGA-3' (reverse)                   |
| Universal ProbeLibrary Probe #39                       |
| GP78                                                   |
| 5'-CTACACCCACGGAATGCAC-3' (forward)                    |
| 5'-GCAGTCCTCACTGTCACAAGA-3' (reverse)                  |
| Universal ProbeLibrary Probe #46                       |
| CHIP                                                   |
| 5'-AGGCCAAGCACGACAAGTA-3' (forward)                    |
| 5'-CAGGTAGTCGGGGATGTCTC-3' (reverse)                   |
| Universal ProbeLibrary Probe #35                       |
| CUL5                                                   |
| 5'-AGAATGTAACTCCGTTGAAGCAC-3' (forward)                |
| 5'-ATGCCTTGGCACTCAGCTA-3' (reverse)                    |
| Universal ProbeLibrary Probe #37                       |
| PARKIN                                                 |
| 5'-GGAGCTGAGGAATGACTGGA-3' (forward)                   |
| 5'-ACAATGTGAACAATGCTCTGCT-3' (reverse)                 |
| Universal ProbeLibrary Probe #85                       |
| GAPDH                                                  |
| 5'-AGCCACATCGCTCAGACAC-3' (forward)                    |
| 5'-GCCCAATACGACCAAATCC-3' (reverse)                    |
| Universal ProbeLibrary Probe #60                       |
|                                                        |
| <b>Cloning primer</b>                                  |
| HSPA5                                                  |
| 5'- <u>ggggatcc</u> ATGAAGCTCTCCCTGGTGG-3' (forward)   |
| 5'- <u>ggctcgag</u> CAACTCATCTTTTTTCTGCTG-3' (reverse) |
| GP78                                                   |

|                                                                 |
|-----------------------------------------------------------------|
| 5'- <u>gggatcc</u> ATGCCGCTGCTCTTC-3' (forward)                 |
| 5'-ggtctagaCTAGGAGGTCTGCTGCTTCTG-3' (reverse)                   |
| Ub                                                              |
| 5'-ATGGATTACAAGGATGACGACGATAAGATGCAGATTTTCGTGAA-3' (forward)    |
| 5'-ggtctagaTTAACCACCTCTCAGAC-3' (reverse)                       |
| HSPA5 (K352R)                                                   |
| 5'- CCAGAAAGTGTGGGAAGATTCTGATTTGAGGAAGTCTGAT-3' (forward)       |
| 5'-ATCAGACTTCCTCAAATCAGAATCTTCCAACACTTTCTGG-3' (reverse)        |
| HSPA5 (K353R)                                                   |
| 5'-CGTCCAGAAAGTGTGGGAAGATTCTGATTTGAAGAGGTCTGATATTG-3' (forward) |
| 5'-CAATATCAGACCTCTTCAAATCAGAATCTTCCAACACTTTCTGGACG-3' (reverse) |
| HSPA5 (K2R)                                                     |
| 5'-CCAGAAAGTGTGGGAAGATTCTGATTTGAGGAGGTCTGAT -3' (forward)       |
| 5'-ATCAGACCTCCTCAAATCAGAATCTTCCAACACTTTCTGG-3' (reverse)        |
| E1A (F66A, D68A)                                                |
| 5'-GGTTTCGCAGATTGCTCCCGCCTCTGTAATGTTGGC-3' (forward)            |
| 5'-GCCAACATTACAGAGGCGGGAGCAATCTGCGAAACC-3' (reverse)            |
